# Supplementary material for: Impacts of surfactants on dissolution and sulfidation of silver nanowires in aquatic environments
Source: Royal Society of Chemistry journal article supplement (doi:10.1039/c8en00898a), 2018-01-01
Supplement: c8en00898a1.pdf [file c8en00898a1.pdf]

1 **Supporting information for:**

2 **Impacts of Surfactants on Dissolution and Sulfidation of Silver Nanowires in**  
3 **Aquatic Environments**

4

5 Yinqing Zhang, Junchao Xia, Jinliang Xu, Binbin Sun, Wei Wu, Lingyan Zhu\*

6

7 Key Laboratory of Pollution Processes and Environmental Criteria (Ministry of Education), Tianjin  
8 Key Laboratory of Environmental Remediation and Pollution Control, College of Environmental  
9 Science and Engineering, Nankai University, Tianjin 300350, P. R. China

10

11

12

13

14

15

16 Summary

17 Number of Pages: 13

18 Page S2: Additional experimental details

19 Page S3-S4: Table S1, Table S2

20 Page S5-S12: Figure S1–Figure S8

21 Page S13: References

22

### 23 **Synthesis and characterization of AgNWs.**

24 AgNWs were synthesized with slight modifications to the solvothermal method. Briefly, 32 mg  
25 NaCl and 3.1 g PVP were dissolved in 28 mL of EG. 0.5 g AgNO<sub>3</sub> was dissolved in 42 mL of EG in  
26 dark. Then the mixed solution of PVP/NaCl/EG was injected to the AgNO<sub>3</sub>/EG solution drop by drop  
27 under vigorous stirring. The mixture solution was kept at 120 °C for 10 min, and was transferred to a  
28 polytetrafluoroethylene (PTFE) autoclave and kept at 160 °C for 7 h. Finally, the PTFE autoclave was  
29 cooled to room temperature. The AgNWs products were washed with ethanol and then ultrapure water  
30 by centrifugal ultrafiltration (Amicon Ultra-15 30kD, Millipore, MA) at 2050 g for 20 min. The  
31 washing process was repeated twice. The stock suspension of AgNWs was stored at 4 °C in dark for  
32 later use.

33 The XRD pattern of the prepared AgNWs are shown in Figure S8A. All peaks can be readily  
34 indexed to cubic-phase Ag (ICDD file: 87-0717). The prominent diffraction peaks from the (111) and  
35 (200) planes, as well as the remaining features, were consistent with those observed for AgNWs in  
36 other studies.<sup>1,2</sup> The result indicated that the silver nanowires were finely crystallized. The bright-field  
37 TEM images of the as-prepared AgNWs are shown in Figure S8B. The nanowires were 2~3 μm in  
38 length and about 40 nm in diameter. The nanowires exhibited fivefold-twinned structures constructed  
39 by five (200) wall-planes and two spear-like ends around the five (111) planes. This supported the  
40 preferred growth of (111) planes, and was consistent with the XRD results reported previously.<sup>2,3</sup> The  
41 XRD and TEM results demonstrated the AgNWs were successfully synthesized.

42

**Table S1.** Binding Energies of AgNWs and the Sulfidized Products

| Sample                                     | Binding Energy (eV) |       |       |                      |                      |                     |                     |
|--------------------------------------------|---------------------|-------|-------|----------------------|----------------------|---------------------|---------------------|
|                                            | C 1s                | N 1s  | O 1s  | Ag 3d <sub>5/2</sub> | Ag 3d <sub>3/2</sub> | S 2p <sub>3/2</sub> | S 2p <sub>1/2</sub> |
| AgNWs                                      | 284.8               | 399.8 | 531.9 | 368.2                | 374.2                |                     |                     |
|                                            | 285.6               |       | 532.8 |                      |                      |                     |                     |
|                                            | 287.9               |       |       |                      |                      |                     |                     |
| Sulfidized<br>products in<br>water         | 284.8               | 399.9 | 531.9 | 368.0                | 373.9                | 161.1               | 162.1               |
|                                            | 285.5               |       | 533.2 |                      |                      |                     |                     |
|                                            | 288.3               |       |       |                      |                      |                     |                     |
| Sulfidized<br>products in<br>CTAB solution | 284.8               | 400.0 | 531.9 | 367.9                | 373.9                | 161.2               | 162.2               |
|                                            | 285.6               |       | 533.4 |                      |                      |                     |                     |
|                                            | 288.6               |       |       |                      |                      |                     |                     |

45 **Table S2.** The specific surface areas of the dissolution products of AgNWs in different surfactants  
46 solution at 2 h.

| Media of AgNWs dissolution | Surface area (m <sup>2</sup> /g) |
|----------------------------|----------------------------------|
| water                      | 9.9                              |
| 1.0 μM SDBS                | 10.2                             |
| 1.0 μM CB                  | 10.9                             |
| 1.0 μM GMS                 | 10.4                             |
| 0.3 μM CTAN                | 13.2                             |
| 1.0 μM CTAN                | 13.7                             |
| 3.0 μM CTAN                | 14.3                             |
| 1.0 μM BDDAN               | 13.8                             |

47

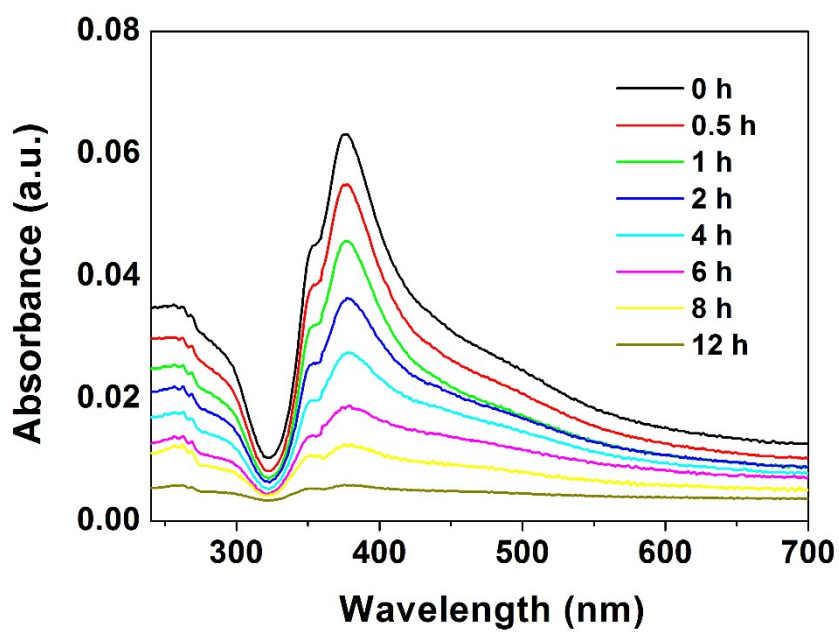

48

49 **Figure S1.** UV-Vis absorption spectra of AgNWs dispersed in 1.0  $\mu\text{M}$  CTAB at different reaction  
50 times.

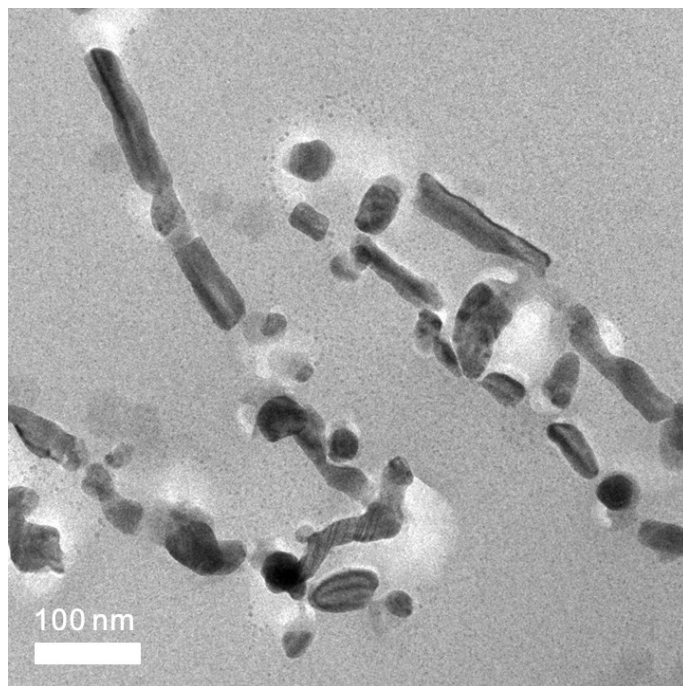

51

52 **Figure S2.** TEM image of AgNWs dispersed in BDDAN solution ( $1.0 \mu\text{M}$ ) under sunlight irradiation  
53 for 30 min. The scale bar of the image represents 100 nm.

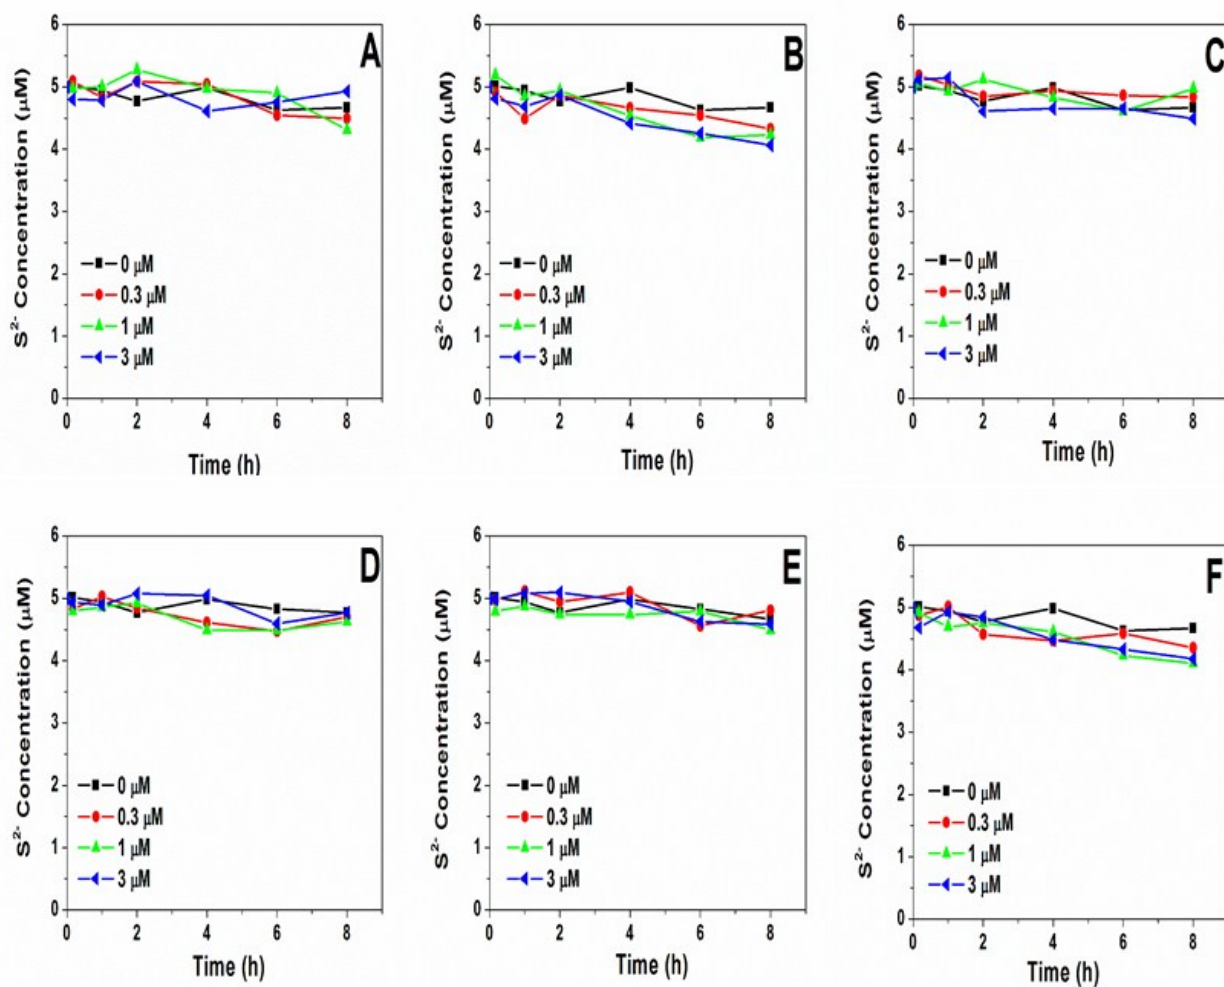

54

55 **Figure S3.** Decrease of soluble sulfide concentration in different surfactant solutions at different  
 56 concentrations in the absence of AgNWs. (A) SDBS, (B), CB (C) GMS, (D) CTAB, (E) CTAN, and  
 57 (F) BDDAN. Data points represent the average of three independent replicates.

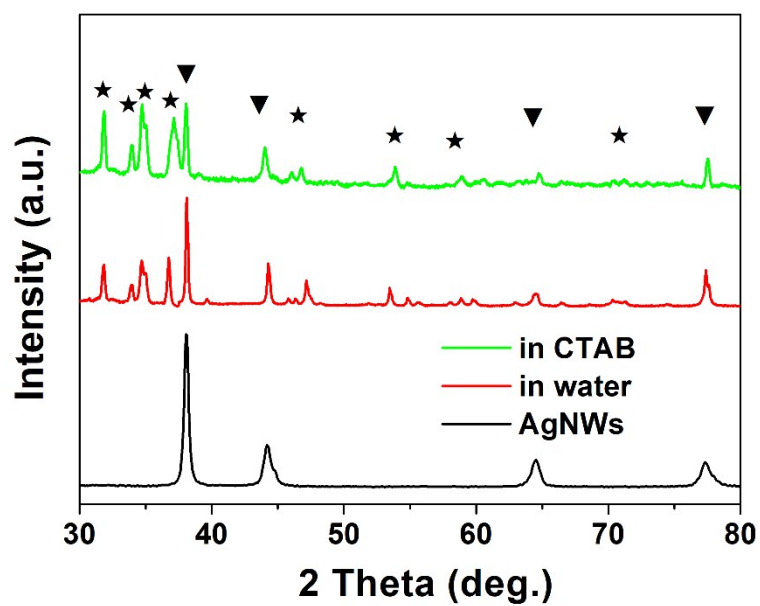

59

60 **Figure S4.** XRD patterns of AgNWs and the products of AgNWs sulfidation at 2 h in water and in  
61 CTAB solution, respectively. The diffraction peaks labeled by ▼ can be attributed to the crystalline  
62 Ag<sup>0</sup> nanowires, and the peaks labeled by ★ can be attributed to Ag<sub>2</sub>S.



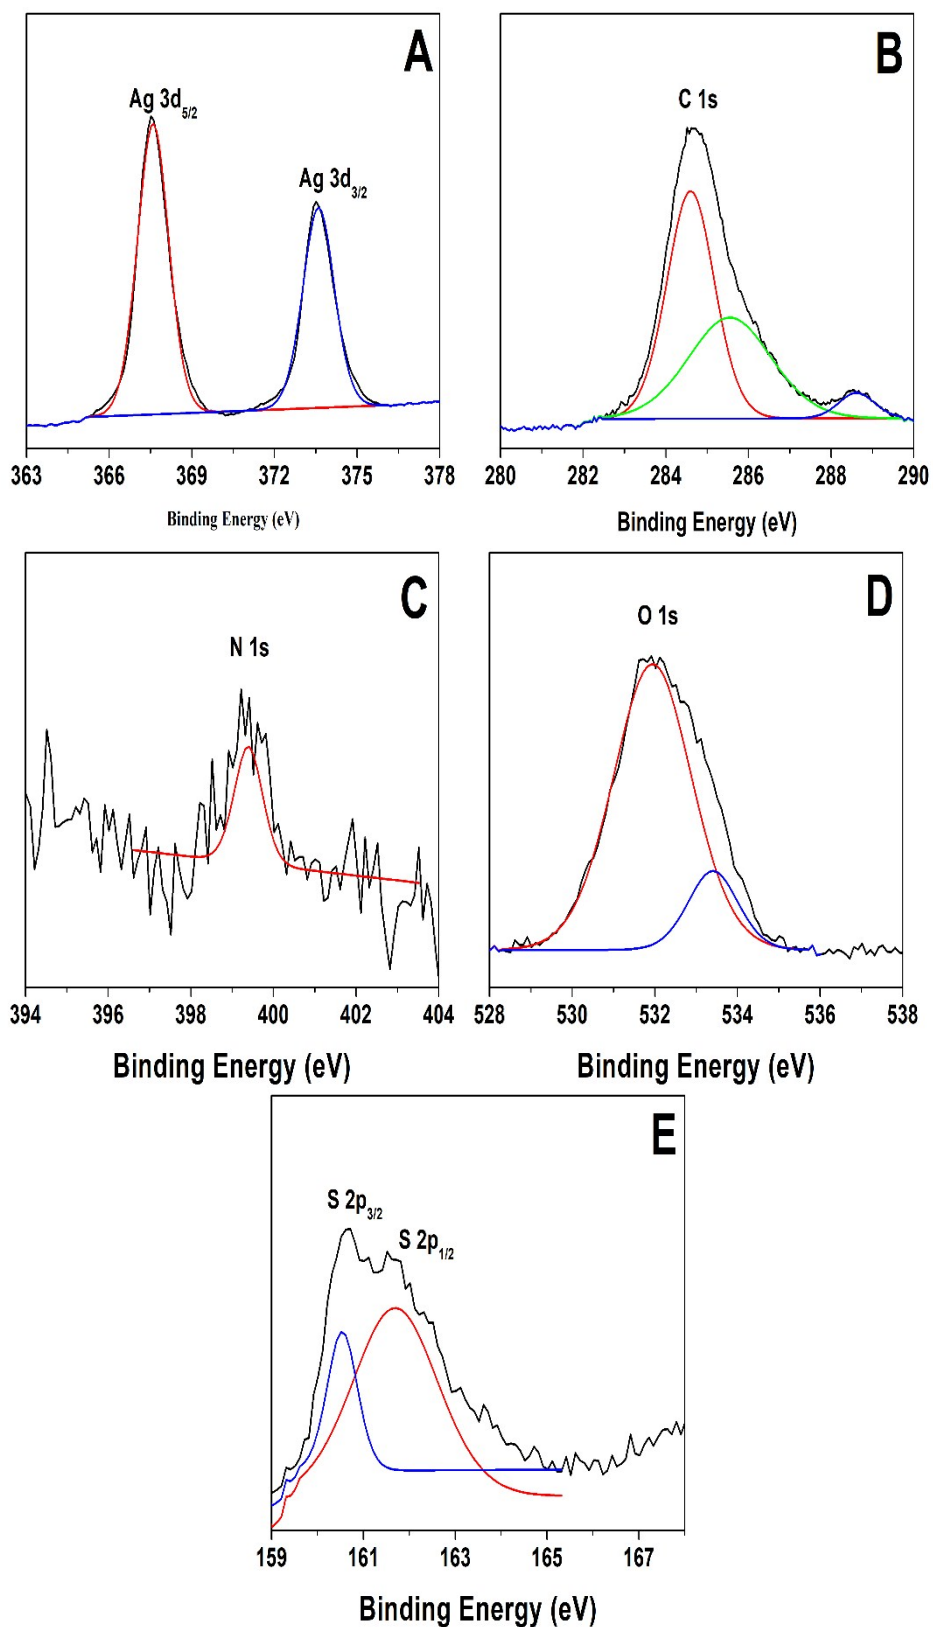

63

64

65

66 **Figure S5.** XPS spectra of the sulfidized products in CTAB solution. (A) Ag 3d<sub>5/2</sub> and Ag 3d<sub>3/2</sub> spectra.

67 (B) C 1s spectrum. (C) N 1s spectrum. (D) O 1s spectrum. (E) S 2p<sub>3/2</sub> and S 2p<sub>1/2</sub> spectra.

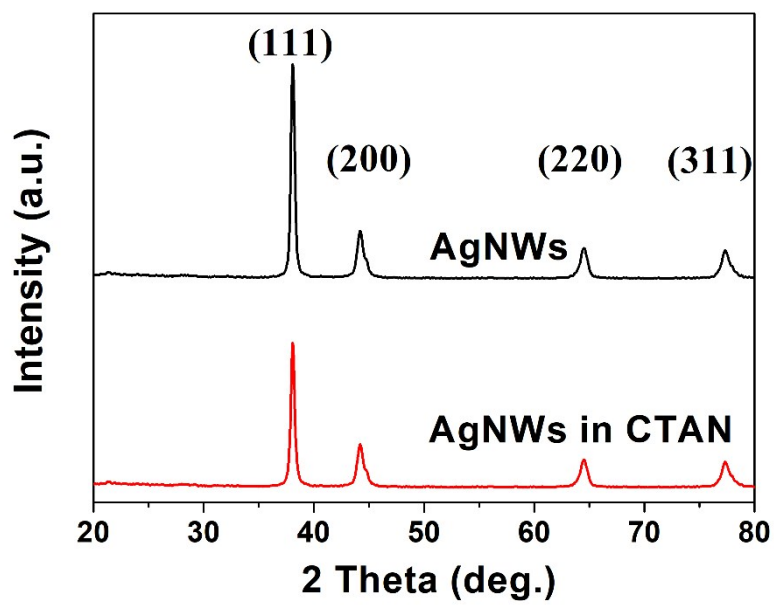

68

69 **Figure S6.** XRD pattern of the original AgNWs and AgNWs dispersed in CTAN solution (1  $\mu\text{M}$ )

70 under sunlight irradiation for 2 h.

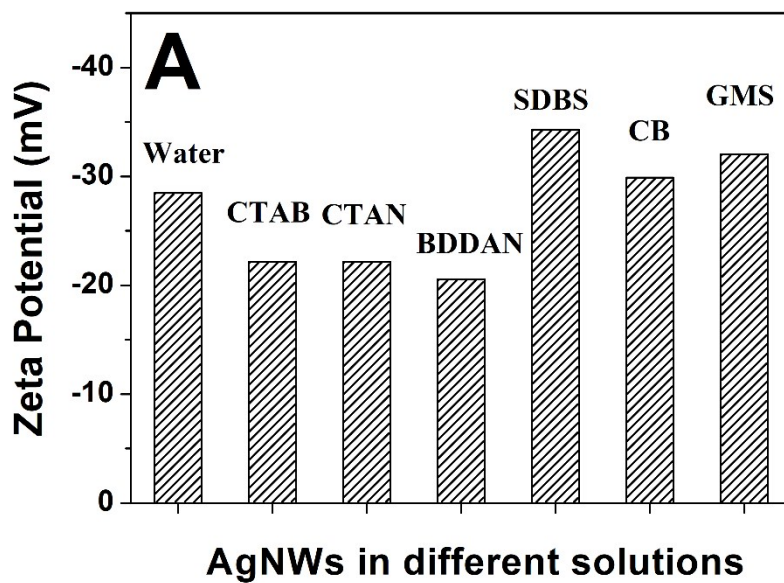

71

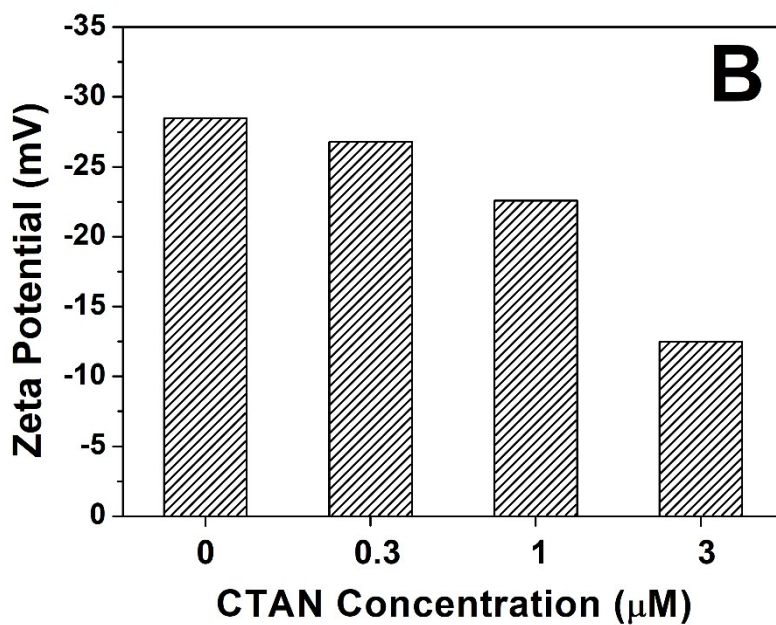

72

73 **Figure S7.** Zeta potential of AgNWs in different solution. (A) AgNWs in different surfactants solution.

74 The concentration of each surfactant was 1  $\mu\text{M}$ ; (B) AgNWs in CTAN solutions at different

75 concentrations.

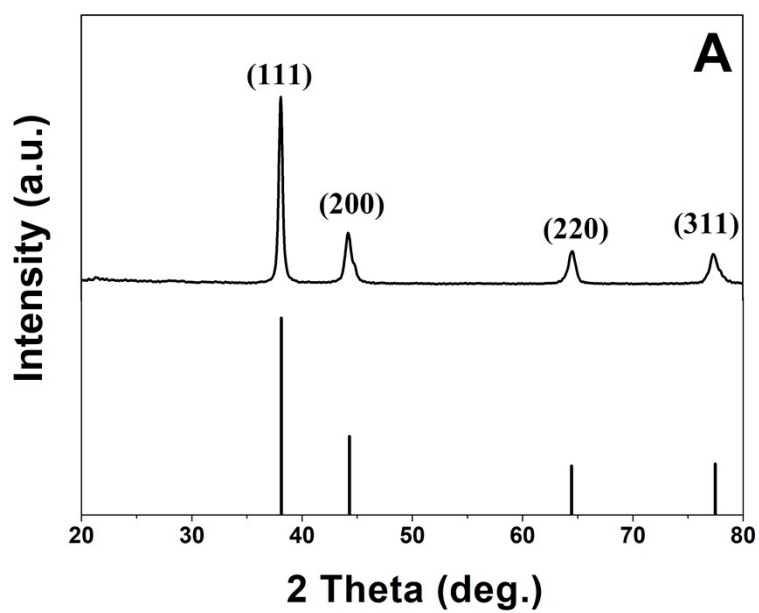

76

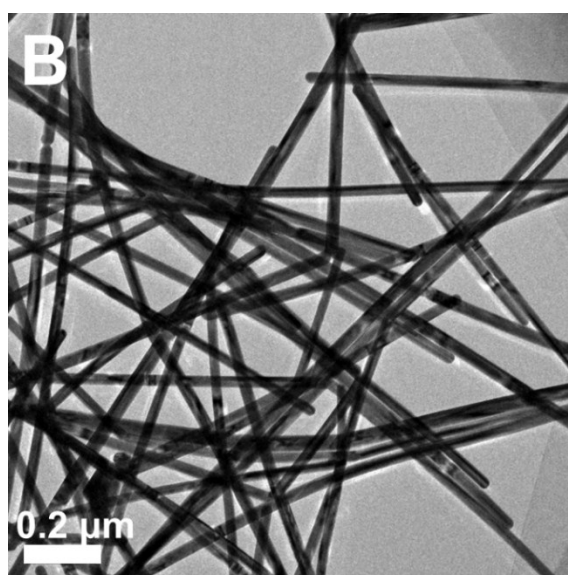

77

78 **Figure S8.** Characterization of as-synthesized AgNWs. (A) XRD pattern of the as-prepared AgNWs;

79 (B) Bright-field TEM image of AgNWs. The scale bar of the image represents 200 nm.

## 80 References

- 81 (1) Sun, Y. G.; Yin, Y. D.; Mayers, B. T.; Herricks, T.; Xia, Y. N. Uniform silver nanowires synthesis by reducing  
82 AgNO<sub>3</sub> with ethylene glycol in the presence of seeds and poly(vinyl pyrrolidone). *Chem. Mater.* **2002**, *14* (11),  
83 4736-4745.
- 84 (2) Jiang, P.; Li, S. Y.; Xie, S. S.; Gao, Y.; Song, L. Machinable long PVP-stabilized silver nanowires. *Chem. Eur.*  
85 *J.* **2004**, *10* (19), 4817-4821.
- 86 (3) Luu, Q. N.; Doorn, J. M.; Berry, M. T.; Jiang, C.; Lin, C.; May, P. S. Preparation and optical properties of  
87 silver nanowires and silver-nanowire thin films. *J. Colloid Interface Sci.* **2011**, *356* (1), 151-158.
